**Confidential Screening for and Management of Intimate Partner Violence Risk using a Commercial Electronic Health Records System**

**Leslie A Lenert<sup>1</sup>, Vanessa Diaz<sup>2</sup>, Kit Simpson<sup>3</sup>, Christine Hahn<sup>4</sup>, Michael Aiken<sup>1</sup>, Elizabeth Swazt<sup>1</sup>, Luke Sox<sup>1</sup>, and Ekaterina Pekar<sup>1</sup>, Naomi Ennis<sup>4</sup>, and Alyssa Rheingold<sup>4</sup>**

**<sup>1</sup>Biomedical Informatics Center, <sup>2</sup>Department of Family Medicine, <sup>3</sup>Department of Healthcare Leadership and Management, <sup>4</sup>National Crime Victims Research and Treatment Center, Medical University of South Carolina, Charleston SC, USA**

**Address requests for information to**

Leslie A Lenert, MD, MS, FACP, FACMI  
Biomedical Informatics Center  
Medical University of South Carolina  
22 West Edge Suite 213  
Charleston, SC 29425

Email: [Lenert@musc.edu](mailto:Lenert@musc.edu)

Telephone: 843-792-1914

## **Abstract**

Intimate partner violence is, unfortunately, a common problem (25% of women) for which screening in primary care is a recommended service. In this paper, we describe modifications to a commercial EHR system (Epic) designed to support confidential screening for and management of IPV in primary care settings. Modifications include the use of an exam room computer as a kiosk for patient-generated health data entry, storage of data in a hidden location, the use of rule-based alerting methods to direct providers to access data, and electronic form-based tools for case management and documentation. While preserving privacy, this approach also allows access by provider type and authorized setting, including use for population health management. The approach was tested in a pilot study and found to be feasible, to have good compliance for provider screening (65%) and is being evaluated in a stepped-wedge trial in other primary care clinics across a large academic health system.

## Introduction

Intimate Partner Violence (IPV) is a frequently occurring event (25% lifetime prevalence) for which screening in primary care is the United States Preventative Service Task Force recommended service [1]. Despite its prevalence, screening for IPV is conducted much less frequently in primary care than screening for other medical conditions such as depression [2]. This is because there are significant barriers to screening. Two convoluted barriers, addressed in this paper, are a lack of privacy in the electronic health record for issues surrounding IPV and a lack of support for assessment, management and referral for subsequent care. We describe herein, modifications to a commercial electronic records system (Epic) that enable confidential screening, assessment, management and referral for IPV.

While IPV poses risks, its victims also fear stigmatization. This is a significant barrier to disclosure: for example, some women in emergency department settings with obvious evidence of injuries, chose not to disclose partner abuse because of privacy and safety concerns [3]. Concerns about confidentiality are a recognized barrier to disclosure in screening [4]. The usual approaches to screen for medical issues, such as the verbal administration of questions by providers may not be as effective in this area. For example, if providers ask IPV-related screening questions in a routine or uncaring way, it can put off patients and discourage honest responses [2]. An alternative approach to screening is to use self-administered computer questionnaires, which is an effective but under-utilized method [5]. However, these methods have an important practical problem—it is difficult to offer IPV victims sufficient privacy during clinical visits for forthright responses. Potential perpetrators could be in the exam room during screening and tablets in the waiting room might not afford sufficient privacy. Screening by sending questionnaires to a patient's phone might offer sufficient privacy; however, there are a growing number of “stalker” apps that could be installed by a perpetrator on the patient’s phone to monitor a patient’s activities online [6].

After screening, providers need to assess the risk of future violence and take actions to mitigate which need to be documented. This can pose additional threats of loss of confidentiality. Moreover, few primary care providers have adequate training in the assessment and management of IPV-related risk. EHR-based decision support tools may help providers feel more comfortable with screening, assessment and management tasks [4,7], and thus encourage compliance with screening guidelines. However, this creates further issues with data privacy. If the data generated by IPV management decision support applications generate electronic health record (EHR) documentation that is easily viewed in the record or shared in medical record releases, this could inhibit disclosures [2,8] or pose additional risks to the victims. An IPV-related diagnosis might be inadvertently disclosed to a perpetrator in a number of ways. For example, IPV diagnoses could appear in printed post-visit summaries for patients, in queries of a 21st Century Cures Act interfaces to the EHR by apps, in medical records releases, and in codes reported to support claims data.

In EHR systems, one approach to preserve privacy for stigmatizing conditions is the segmentation of data from the general medical record. In specialty care, management of confidential conditions such as drug abuse can occur in secure “departments” matched to organization units, that prevent record viewing by other providers. In some circumstances, specific providers not in the organizational unit can have what is called “break the glass” capability in the Epic EHR for medical emergencies, which allows a

provider to view segmented parts of the record but also creates a record of the event in a log file and/or a notification event sent to a data security officer.

In primary care settings, where patient care typically involves care of multiple problems at the same time, maintaining differential patient privacy while screening for and managing a condition *confidentially* is difficult to implement. Segmentation of specific data elements has not been widely implemented in commercial EHR systems. For example, while drug abuse issues in a drug addiction treatment clinic might be protected by “break the glass”-like functionality, in primary care settings, entry of a problem list diagnosis of opioid abuse (F11.1) would make it available broadly across a healthcare enterprise and result in its inclusion in summary documents and disclosed medical record requests. Questionnaire responses in patients who experience physical or mental abuse in a relationship, or even the act of screening for such issues, could result in the introduction of specific codes for such into the medical record such as Z91.41 (personal history of adult physical and sexual abuse) into parts of the medical record, especially if physicians document the screening or counseling in their notes. Even so, because the essence of primary care is the longitudinal follow-up of patients over time, it is critical to somehow notify a provider of a prior history of positive screening results for IPV and encourage periodic reassessment.

While screening and counseling for IPV is a billable activity, the desire of providers to keep discussions as private as possible may result in the provider not using an IPV-related billing code and losing potential credit for time spent counseling in provider productivity calculations. An approach to document time spent in confidential activities that a health system might *choose not to bill for* because of privacy concerns may be important to incentivize providers’ screening for IPV.

In this paper, we describe modifications to a commercial EHR, Epic, designed to allow its use to screen for and care for a confidential condition while maintaining differential data privacy in a primary care setting. The approach is pragmatic but comprehensive, screening patients privately using self-reported questionnaires and preventing accidental disclosures in visit summaries, billing records, and releases of medical records but also supporting providers in assessments and allowing providers to track at-risk patients, assess and document individual risk, document time spent on IPV care and provide follow up initial care for IPV positive screening patients. The approach uses pop-up-style alerts to notify providers of IPV screening requirements and of prior data while storing results in a segmented part of the record.

## **Methods**

Working with key stakeholders (i.e., providers, patients, IPV survivors, and IPV experts) we adapted an existing program for IPV screening with both paper-based and computer-based components used within Northern California Kaiser Permanente Health System [9] to be fully implemented within the EHR *in a privacy-preserving manner*. The implementation included the creation of a registry of targeted patients (women 18 to 50 years of age, who are the highest risk group) being seen in primary care clinics on an annual basis. The resulting workflow was complex and included population health, patient data input, and provider input components as shown in Figure 1. The EHR’s registry monitored patients meeting inclusion criteria and triggered in-menu alert notifications to medical assistants reminding them to screen a patient for IPV on an annual basis using a non-interruptive alert (Figure 2).

Responding to the alert converted the exam room computer to a kiosk-like mode for a patient to self-administer a questionnaire. The medical assistant assured that the patient was alone, by removing another adult-age family from the room, to allow private responses to the 3-item initial screening questionnaire [10]. If positive, additional questionnaires were administered to assess risk levels [11] (figure 3).

Completion of the questionnaires resulted in a lock screen on the exam room computer to await the provider's login for their portion of the visit. If the patient has screened positive for IPV, a second, blocking style popup alert notified the provider and took the provider to an electronic form that reviewed the patient's responses (figure 4), and helped evaluation of risk levels, additional recommended follow-up questions with example scripted responses, documentation of counseling on the patient, and of time spent on this issue during the visit (Figure 5).

The results were stored in an electronic flow sheet segmented from other visit records. On return visits, patients with positive prior screenings are rescreened and providers were directed to the flow sheet to review prior data by a different blocking-style popup alert. Providers then completed reassessments of risk, physical exam findings, and document follow-up recommendations.

Referral for post-visit care was managed in two ways. In settings of immediate risk to the patient, there was a protocol for immediate outreach to hospital security and a nurse specialist providing IPV support to the Emergency Department. For lower-risk cases, patients were referred to a national hotline for counseling and support for IPV victims. In cases where the abuse of the victim was observed by children, the provider was reminded in the documentation tool to immediately refer the case to state child protective services, as required by law, and contact information was given.

After pilot testing using simulated patients in a controlled setting, and further refinement of workflows for interactive assessment of IPV risks by a provider, we implemented our screening program in a primary care clinic. The staff was trained in the use of the IPV screening system using in-person and online tools. Educational materials included tip sheets on intimate partner violence and how to implement screening procedures, video demonstrations of EHR use, as well as videos demonstrating suggested scripting for interactions with patients. Clinic compliance with screening was monitored weekly with discussions with clinic leadership and retraining provided. No other incentives for the adoption of the screening program were offered. The study was implemented as a quality improvement project and deemed exempt from human subjects review on that basis by a University institutional review board.

## Results

The pilot phase began on March 4<sup>th</sup> of 2020. Unfortunately, COVID-19 social distancing policies at MUSC resulted in the closure of almost all in-person operations in the pilot clinic (and as a result, cessation of screening) on March 19th. During this two-business-week period, there were 57 eligible patients seen. Of these, 38 had screening initiated and 37 patients finished screening 65% compliance. Two patients screened positive and were further evaluated. Both patients were fully assessed by the providers in response to the pop-up alert. In both cases, the provider documented that it required between 0-15

minutes of additional time to complete counseling. Data collection during in-person visits continued in the pilot clinic until the end of the first quarter, as patients continued to be seen intermittently.

After the reopening of in-person clinic operations, we began a stepped wedge design [12] rollout across 20 primary care clinics in 2021. Table 1 shows interim results over the first two iterations of the stepped design. Uptake across clinics after the restoration of operations was lower than in the pilot phase, except for one clinic, and clinic adoption was widely disparate despite the efforts of the investigators to encourage adherence. Lower uptake was seen in the context of reduced clinic staffing due to the ongoing Covid-19 emergency. One clinic administrator thought the questionnaire administration process was too disruptive to clinical workflows to adopt and refused to participate.

**Table 1. Interim analysis of clinic compliance**

| <b>Completion Rate</b> |        |       |        |        |        |        |                    |        |
|------------------------|--------|-------|--------|--------|--------|--------|--------------------|--------|
| <b>Department</b>      | 2020   | COVID |        |        |        | 2022   | <b>Grand Total</b> |        |
|                        | Qtr1   | Pause | 2021   | Qtr2   | Qtr3   | Qtr4   |                    | Qtr1   |
| Pilot site             | 62.32% |       |        |        |        |        | 52.32%             |        |
| clinic 1               |        |       |        |        | 13.33% | 38.18% | 29.07%             | 31.42% |
| clinic 2               |        |       | 34.58% | 15.68% | 5.34%  | 34.70% | 26.52%             | 22.21% |
| clinic 3               |        |       |        |        | 11.70% | 23.82% | 47.53%             | 30.52% |
| clinic 4               |        |       | 42.17% | 26.34% | 23.60% | 53.69% | 42.86%             | 37.20% |
| clinic 5               |        |       | 64.76% | 60.84% | 54.94% | 65.18% | 68.29%             | 51.57% |
| clinic 6               |        |       |        |        | 3.70%  | 0.23%  | 0.56%              | 0.68%  |
| clinic 7               |        |       | 43.22% | 9.41%  | 4.13%  | 28.81% | 20.77%             | 17.85% |
| clinic 8               |        |       | 65.28% | 55.50% | 29.67% | 58.62% | 74.68%             | 53.08% |
| clinic 9               |        |       |        |        | 5.36%  | 14.52% | 16.59%             | 14.38% |
| clinic 10              |        |       |        |        | 3.57%  | 23.55% | 24.67%             | 22.24% |

## Discussion

This paper describes a pragmatic approach to screening for confidential conditions and segmentation of subsequent data in the clinical record with preservation of the ability to use that data in subsequent clinical care and population health management. The approach uses alert triggers linked to pop-up reminders of critical data in the chart and the need for assessment or follow-up. This approach takes advantage of the greater flexibility provided by decision support tools in the EHR to limit the presentation of data to providers in specific circumstances, as specified in the rule. This workaround allows the designation and the maintenance of differential privacy in the record within a visit. Visualization of data in the record uses a combination of an EHR Flow Sheet data structure as a time-oriented variable-sized data container, in combination with Epic specific tool, a “SmartForm” software object that retrieves the data and presents in a manageable way for use in primary care practices, as well as providing support for assessment.

The use of pop-up alerts allows both clinic-specific and personnel-specific constraints on access. It also can remind providers to view relevant confidential data when caring for persons in a different context. For example, a pop-up alert could notify an emergency department provider or a radiologist to view IPV risk data when reviewing evaluating a patient. Tracking of access to confidential data for enforcement of privacy restrictions, which is the critical feature of “break-the-glass” functionality, is not lost by using a popup alert-driven approach. Providers can be tracked by mechanisms that record responses to pop-up alerts in the EHR for quality improvement purposes. However, one limitation of the approach is that tracking of access by browsing of electronic flow sheet data in the EHR is not possible.

Explicitly modeling security at a data element level is not a feature of current commercial EHRs. A trial in an experimental version of the Regenstrief Institute’s CareView system (now replaced by a commercial system), demonstrated the feasibility of patients designating certain sections for restricted access by providers, and the potential acceptance of providers of this approach [13,14].

Recent changes in privacy protections for women’s healthcare have come about with the *Dobbs vs. Jackson Women's Health Org* ruling, which severely limits the rights of privacy established in *Roe vs. Wade* [15]. These changes highlight the need for differential privacy in health records for women’s health issues beyond IPV. While this application was designed to enhance privacy for better reporting and patients’ safety, there are now legal issues that should prompt EHR developers and policymakers to take a careful look at differential privacy in the record. As currently mandated by the 21st Century Cures Act and implemented within certified EHR systems, given a request for a medical record using electronic means, a provider is required to transfer a complete electronic record of care [16]. This could be problematic for both patients and their healthcare providers if the provision of that care is unlawful in the state of the requestor. Clayton and colleagues have proposed a variety of ad hoc solutions for responding to this challenge [17]. Approaches such as shadow records and clinic-specific paper charts may prevent disclosures but also would lock information away to prevent its positive uses, such as population health practices for subsequent management or alerts to other providers. Segmentation of data in the EHR record with infrastructure to prevent transmission unless authorized by the patient and provider could address many issues related to inadvertent disclosure. Our work shows how this could be implemented today in an existing commercial EHR.

## **Limitations**

Segmentation of data in custom flow sheets in an EHR does create new issues as to what constitutes the official medical record in an EHR system. Pop-up alerts may have to be implemented for the specific care settings to inform providers that need to be aware of screening results. These interruptive alerts may be missed by providers, as compliance with this type of alert is not consistent. On the other hand, a specific alert for positive data on IPV risk may be very helpful in certain settings to direct a provider’s attention to the issue of a non-accidental cause of an injury, for example, in the emergency department. This approach does not preclude a provider from documenting IPV in the record if he or she feels it is appropriate to do so.

The rate of adoption of the highly confidential screening workflow was initially good (67%) but fell in a post-COVID-19-peak setting to less than optimal in rollouts to additional clinics. The screening was voluntary and as a result, charts could be closed without doing the screening. There was consideration given to including the IPV screening component as a required operation similar to some other health screening areas but based on feedback from stakeholders, we opted to keep screening voluntary. A greater ability to customize patient-generated data collection to clinic workflows could improve adherence rates. The current approach tracks provider time for counseling but does not provide further incentives. If incentive programs for clinic and provider staff for compliance were added to this implementation, results could further improve.

## Conclusions

Practical approaches to segment EHR data to enhance patients' privacy are critically important to develop. This study demonstrates the feasibility of secure confidential screening of patients for intimate partner violence in primary care settings, and secure confidential management of data on IPV risk in the EHR. Results from an ongoing study will assess the impact of the approach and the feasibility of scaling the approach across an enterprise.

**Funding Statement:** This work was funded by grant R18HS025654 from the Agency for Healthcare Research and Policy.

**Competing Interests:** None

**Contributorship:** LL and AR conceived of the study, obtained funding, supervised implementation, and contributed to the authorship of the manuscript. VD and KS contributed to the design of the study and to the authorship of the manuscript. VD had a lead role in the implementation of the study. CH, MA, ES, LS, EK, and NS contributed to the design and implementation of the study and to editing of the manuscript.

**Acknowledgments:** We are grateful to BMIC and clinical team members for their support that made the study possible.

**Software availability:** The software is available to other Epic customer institutions on request to [Lenert@musc.edu](mailto:Lenert@musc.edu).

**Data availability:** Data are available on written request to [Lenert@musc.edu](mailto:Lenert@musc.edu).

## References



- 1 Nelson HD, Bougatsos C, Blazina I. Screening women for intimate partner violence: a systematic review to update the U.S. Preventive Services Task Force recommendation. *Ann Intern Med* 2012;**156**:796–808, W – 279, W – 280, W – 281, W – 282.
- 2 Dichter ME, Makaroun L, Tuepker A, *et al.* Middle-aged Women’s Experiences of Intimate Partner Violence Screening and Disclosure: ‘It’s a private matter. It’s an embarrassing situation’. *J Gen Intern Med* 2020;**35**:2655–61.
- 3 Lustig L, Fishenson E, Natan MB. Characteristics of Women Presenting at the Emergency Department Who Choose Not to Disclose Being Subjected to Intimate Partner Violence. *J Interpers Violence* 2022;**37**:NP12133–45.
- 4 Tu J, Pentt B. How We Talk About ‘Perpetration of Intimate Partner Violence’ Matters. *J Am Board Fam Med* 2020;**33**:809–14.
- 5 Frazier T, Yount KM. Intimate partner violence screening and the comparative effects of screening mode on disclosure of sensitive health behaviours and exposures in clinical settings. *Public Health* 2017;**143**:52–9.
- 6 Chen BX. ‘Stalkerware’ Apps Are Proliferating. Protect Yourself. The New York Times. 2021.<https://www.nytimes.com/2021/09/29/technology/personaltech/stalkerware-apps-protection.html> (accessed 31 Oct 2022).
- 7 Dichter ME, Wagner C, Goldberg EB, *et al.* Intimate Partner Violence Detection and Care in the Veterans Health Administration: Patient and Provider Perspectives. *Womens Health Issues* 2015;**25**:555–60.
- 8 Kennedy AC, Prock KA. ‘I Still Feel Like I Am Not Normal’: A Review of the Role of Stigma and Stigmatization Among Female Survivors of Child Sexual Abuse, Sexual Assault, and Intimate Partner Violence. *Trauma Violence Abuse* 2018;**19**:512–27.
- 9 Decker MR, Frattaroli S, McCaw B, *et al.* Transforming the healthcare response to intimate partner violence and taking best practices to scale. *J Womens Health* 2012;**21**:1222–9.
- 10 Feldhaus KM, Koziol-McLain J, Amsbury HL, *et al.* Accuracy of 3 brief screening questions for detecting partner violence in the emergency department. *JAMA* 1997;**277**:1357–61.
- 11 Messing JT, Campbell JC, Snider C. Validation and adaptation of the danger assessment-5: A brief intimate partner violence risk assessment. *J Adv Nurs* 2017;**73**:3220–30.
- 12 Hemming K, Haines TP, Chilton PJ, *et al.* The stepped wedge cluster randomised trial: rationale, design, analysis, and reporting. *BMJ* 2015;**350**:h391.
- 13 Tierney WM, Alpert SA, Byrket A, *et al.* Provider responses to patients controlling access to their electronic health records: a prospective cohort study in primary care. *J Gen Intern Med* 2015;**30 Suppl 1**:S31–7.
- 14 Leventhal JC, Cummins JA, Schwartz PH, *et al.* Designing a system for patients controlling providers’ access to their electronic health records: organizational and technical challenges. *J Gen Intern Med* 2015;**30 Suppl 1**:S17–24.

- 15 Shachar C. HIPAA, Privacy, and Reproductive Rights in a Post-Roe Era. *JAMA* 2022;**328**:417–8.
- 16 Arvisais-Anhalt S, Lau M, Lehmann CU, *et al*. The 21st Century Cures Act and Multiuser Electronic Health Record Access: Potential Pitfalls of Information Release. *J Med Internet Res* 2022;**24**:e34085.
- 17 Clayton EW, Embí PJ, Malin BA. Dobbs and the future of health data privacy for patients and healthcare organizations. *J Am Med Inform Assoc* Published Online First: 1 September 2022. doi:10.1093/jamia/ocac155

**Figure Legends:**

**Figure 1. Workflow for IPV screening, risk assessment and management.**

**Figure 2. Summary of Screening questionnaire responses displayed. Used with Permission of Epic Systems.**

**Figure 3 Provider tool for the assessment of risk for patients screening positive for IPV risk, documentation of physical examination findings, and for referral for additional counseling or care. Used with Permission of Epic Systems.**

# Workflow for IPV Screening

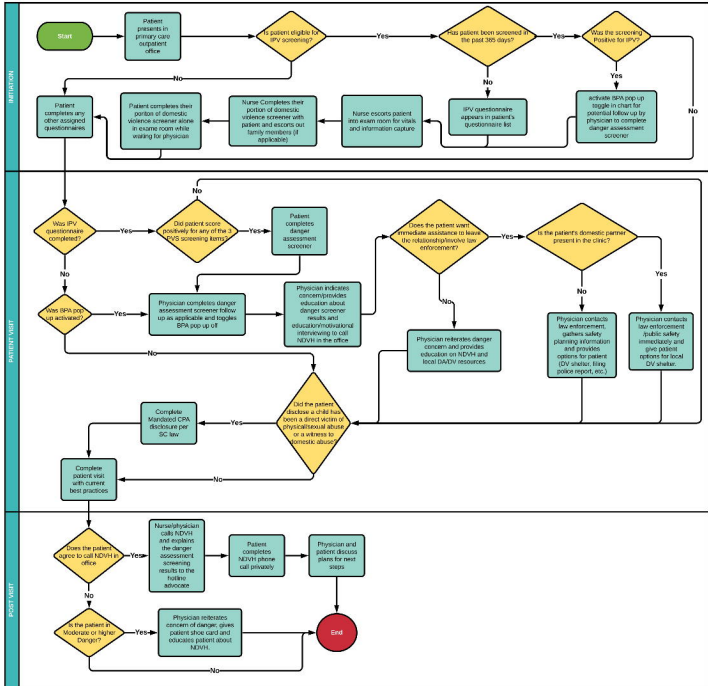

### Rooming

Visit Info Allergies Verify Rx Benefits Outpatient Meds Review Patient Qs

Female, 37 y.o., UY1198  
HARRIS 005440488  
Code 18 on file (per ACP drop)  
SOLD Patient Name  
Treatment Team  
Attending  
Lab Patient Collection Type  
Name

COVID-19 Vaccines Unknown  
COVID-19 COVID-19 Active Infection  
Isolation None  
Intimate Partner Violence Screening  
Research Participate

IC 1 - General

Coverage Name  
Allergies: NO KNOWN ALLERGIES  
ICF Status: None  
SOLD PATIENT YES! for Back Pain  
Weight: 54.4 kg (120 lb)  
> 167 days

**Total Credits: 7,065.00**

SINCE LAST MUSIC HEALTH PRIMARY CARE - CARING AND SUPPORTIVE VISIT  
No visits  
No results  
CARB MAPS  
COVID-19 vaccine (0)  
INFLUENZA VACCINE  
PROBLEM LIST (0)  
SOCIAL DETERMINANTS Not on file

Visit Information  
Chief Complaint  
Back Pain  
Recent Visits with MD  
Date Primary Dx W  
03/24/2022  
01/14/2022  
00/17/2021  
Other Visits in Internal Medicine  
Date Provider Primary Dx  
03/12/2020

Allergies/Contraindications  
 No Known Allergies Last Updated by [redacted] on 08/02/21 3:38 PM (History)  
No known Allergies  
Never allergic  Mark as Reviewed  Last Reviewed by [redacted] on 02/02/21 4:38 PM (History)

Verify Pharmacy Benefits  
No information available.  
The patient might not have insurance or might have insurance that doesn't cover pharmacy benefits.

Outpatient Medications  
No medications on file.  
 Mark as Reviewed Last Reviewed by [redacted] on 11/14/2020 at 3:52 PM  
History

Review Patient Questionnaires  
File/View Patient-Reported Data (last 720 hours) # of In-Hospital No documentation.

History - All Topics  
Medical History  
Diagnosis: None Consistent Source: None  
Anemia  
Anxiety  
Family History  
No family history on file.  
Tobacco Use  
Never smoked smoking status.  
Smokerless Tobacco: Unknown status of smokerless tobacco use.

Visit Checklist-Click Refresh to update  
Current as of Monday April 18, 2022 12:38 PM. Click to refresh.

Rooming Tasks  
V Chief Complaint  
 Allergies updated & "Mark As Reviewed"  
 Reconcile Dispense has been completed  
 Verify Rx Benefits has not been done  
 Outpatient Meds updated & "Mark As Reviewed"  
 Blood Pressure taken & documented  
 Weight documented  
 Height documented

Screenings Due (display with red x)  
 Smoking Status has not been documented  
 Smokeless Tobacco has not been documented  
 Abuse/Neglect Screening Due  
 Depression Screening Due  
 Oral Health Screening Due (REQUIRED FOR PRIMARY CARE CLINICS - NEW PATIENTS ONLY)  
 Annual Learning Screening Due (REQUIRED FOR MHA CLINICS)  
 Pain Screening Not Completed (REQUIRED FOR MHA CLINICS)  
 Intimate Partner Violence (IPV) screening has not been completed. (Click the yellow BPA in the patient storyboard)

Care Gaps  
Overdue  
New Date COVID-19 Vaccine (1)  
Jul 1 INFLUENZA VACCINE (Yearly, August to April)  
2021 Last completed: Jul 2, 2019

## Critical Alert (1)

⊕ Please evaluate the patient for intimate partner violence.

➔ IPV Visit Navigator Activity

Dismiss

## Popup alert

### 🗨️ Current Encounter IPV Questionnaire Response

#### 🗨️ Musc Rsch Ipv Screening

##### Question

Have you been hit, kicked, punched, pushed, shoved, or otherwise hurt by someone at home in the past year?

[REDACTED]  
Yes

--- If yes, by whom? (Select all that apply)

Husband or Wife

Do you feel safe in your current relationship?

No

Is there a partner from a previous relationship who is making you feel unsafe now?

Yes

Has the physical violence increased in frequency or severity over the past year?

Yes

Has your partner (or ex) ever used a weapon against you or threatened you with a weapon?

Yes

Do you believe your partner (or ex) is capable of killing you?

Yes

Is your partner (or ex) violently and constantly jealous of you?

No

Has your partner (or ex) ever tried to choke (strangle) you?

No

Do you feel in danger right now?

Yes !!

Danger Assessment Total Score (range: 0 - 5)

3 (High risk for significant physical harm or being killed in the future) !!

## Summary of responses

For an upcoming appointment with [REDACTED]  
Has the physical violence increased in frequency or severity over the past year?

Has your partner (or ex) ever used a weapon against you or threatened you with a weapon?

Do you believe your partner (or ex) is capable of killing you?

Is your partner (or ex) violently and constantly jealous of you?

Has your partner (or ex) ever tried to choke (strangle) you?

Proceed to next page

For an upcoming appointment with [REDACTED]

\* Indicates a required field.

\* Do you feel in danger right now?

Proceed to next page



**This Smartform is confidential and will not appear anywhere else in the patients chart.**

### Suggested verbiage for physican

As your doctor, I am concerned about your safety in your relationship. I want you to know that you are not alone and help is available. I do have several follow-up questions that may assist me in best being able to help you.

### Provider Follow-up Safety Questions

|                                                                                                                                                                                               |     |    |             |
|-----------------------------------------------------------------------------------------------------------------------------------------------------------------------------------------------|-----|----|-------------|
| Does your partner have access to a firearm?                                                                                                                                                   | Yes | No | Pt Declined |
| Is your partner here at the clinic today?                                                                                                                                                     | Yes | No |             |
| I am concerned that you are in danger. For your safety do you want me to help you connect to police to make a report and keep you safe?                                                       | Yes | No |             |
| For your safety do you want me to help you connect to the local domestic violence shelter to hear about ways to stay safe either remaining in the relationship or how to leave is a safe way? | Yes | No |             |

### Facilitated Hand Off to National Hotline

Given you said that you are in fear of danger today, we are very concerned and are reluctant to have you leave without hearing more about safety planning. I want you to know that I am concerned about your safety, but I understand that it can be intimidating to reach out for help or to know what resources are available. I want to share the number to the National Domestic Violence Hotline with you, which is an organization that specializes in providing expert support on relationship abuse and can help connect you to local resources. It is a 24/7 hotline that is confidential, anonymous, free of cost and accessible through phone, chat or text. The advocates at The Hotline are highly trained and here to help with whatever you feel ready to do. I can connect you to them if you feel comfortable with that, how does that sound?

### Contact National Domestic Violence Hotline: 800-799-7233

Protocol:

- 1) Call Hotline with patient in a private room from clinic phone.
- 2) With patient's permission provide screening results to hotline advocate.
- 3) Pass phone to patient.
- 4) Leave room for patient privacy.
- 5) After call is complete, review plan with patient for next steps.
- 6) Schedule follow-up visit.

|                                 |     |    |             |
|---------------------------------|-----|----|-------------|
| Was a call to the hotline made? | Yes | No | Pt declined |
|---------------------------------|-----|----|-------------|

### Additional Useful Psychoeducation if patient is hesitant

Domestic violence is common and happens in all kinds of relationships. This is not your fault. It usually does not go away on its own and tends to get worse and more frequent over time. It can have significant impact on your health and well-being. There are people who can help you and we have many resources available at MUSC. Remember, you are not alone.

If patient is reluctant to contact IPV hotline here are some tips [Additional Provider Tips](#)

### Physical Exam

|                                |     |    |             |
|--------------------------------|-----|----|-------------|
| Was a physical exam performed? | Yes | No | Pt declined |
|--------------------------------|-----|----|-------------|

|                  |          |          |         |                    |          |          |         |
|------------------|----------|----------|---------|--------------------|----------|----------|---------|
| Skin             | Positive | Normal   | Comment |                    |          |          |         |
| Abrasion         | Positive | Negative | Comment | Bruising           | Positive | Negative | Comment |
| Burn             | Positive | Negative | Comment | Ecchymosis         | Positive | Negative | Comment |
| Burn on left arm |          |          |         |                    |          |          |         |
| Erythema         | Positive | Negative | Comment | Laceration         | Positive | Negative | Comment |
| Lesion           | Positive | Negative | Comment | Petechiae          | Positive | Negative | Comment |
| Musculoskeletal  | Positive | Normal   | Comment |                    |          |          |         |
| Decreased ROM    | Positive | Negative | Comment | Decreased Strength | Positive | Negative | Comment |
| Pain             | Positive | Negative | Comment | Swelling           | Positive | Negative | Comment |
| Tenderness       | Positive | Negative | Comment | Bony Tenderness    | Positive | Negative | Comment |

Please document any other relevant physical / neurological findings. Anything documented in this section is protected from the rest of the patients chart.
